# Supplementary material
Source: PubMed Central journal article supplement (PMC3111334)
Supplement: 1100977108_pnas.1100977108_SI.pdf [file 1100977108_pnas.1100977108_SI.pdf]

# Supporting Information

Guan et al. 10.1073/pnas.1100977108

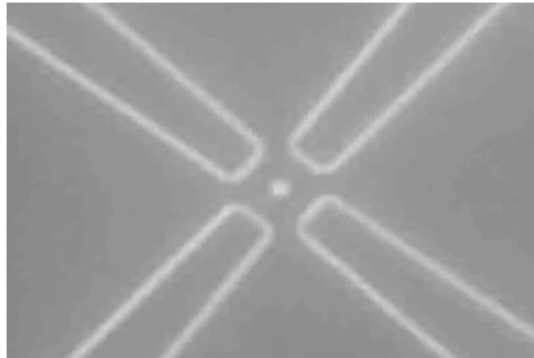

**Movie S1.** Typical dynamics of four basic operations: trapping with small fluctuations, trapping with large fluctuations, unstable trapping region (ejection), and resuming trapping.

[Movie S1 \(WMV\)](#)
